# Supplementary material
Source: PubMed Central journal article supplement (PMC6886476)
Supplement: NIHMS1057936-supplement-Supplemental.pdf [file NIHMS1057936-supplement-Supplemental.pdf]

SUPPLEMENTAL MATERIAL

a) Diagram showing the relationship between the parents/grandparents

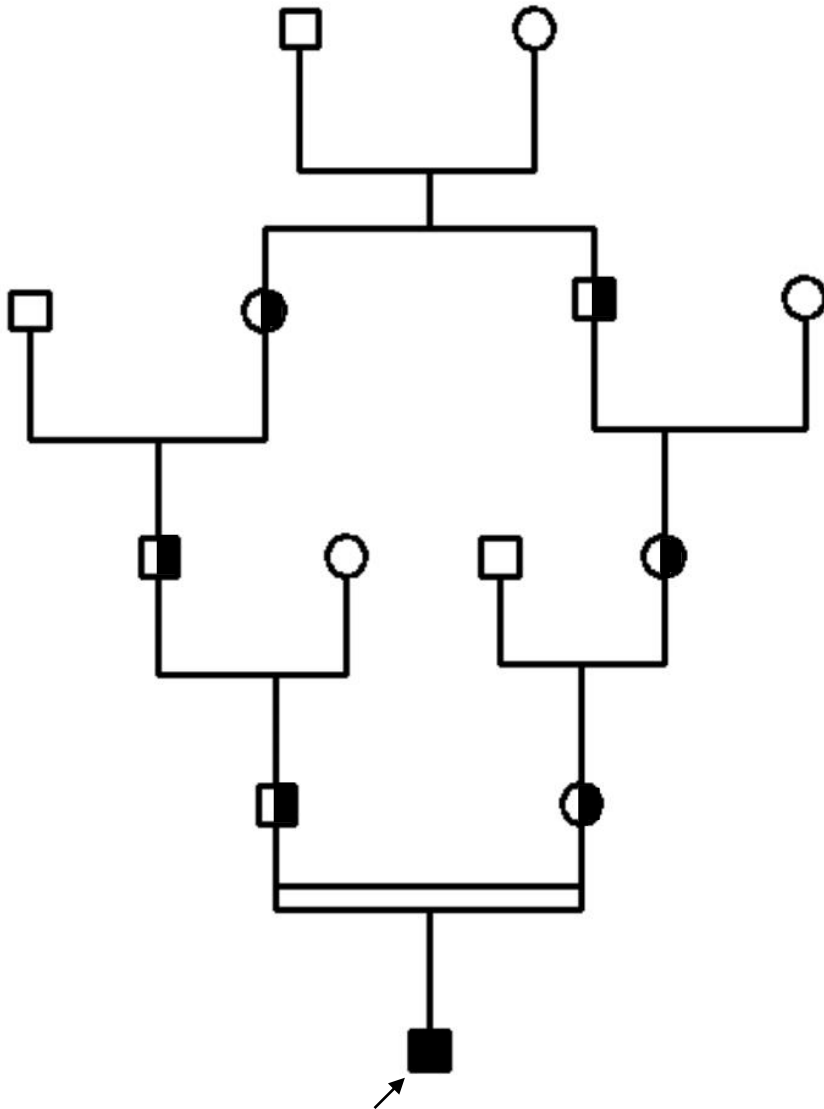

b) Primers used for the experiments:

For the hMTPPT:

the forward primer was: 5'-AGCATGAGCGCCTGTCGC-3',  
the reverse primer was: 5'-TGAGCTGGGACGTGTCCTTTCCA-3'.

For the human  $\beta$ -actin:

the forward primer was: 5'-CATCCTGCGTCTGGACCT-3',  
the reverse primer was: 5'-TAATGTCACGCACGATTTCC-3'
